# Supplementary material
Source: publisher site journal article supplement (https://www.dovepress.com/article/245861)
Supplement: Supplementary file 1 [file get_supplementary_file.php]

Supplementary table 1 sequences of synthetic oligonucleotides

| AR-homo-357 | F：GCAGAAAUGAUUGCACUAUTT | R:AUAGUGCAAUCAUUUCUGCTT |
| --- | --- | --- |
| AR-homo-544 | F：GACAGUGUCACACAUUGAATT | R:UUCAAUGUGUGACACUGUCTT |

Supplementary table 2 sequences of synthetic oligonucleotides

| KLK2 | F：ttctctccatcgccttgtct | R：gttgggaatgcttctcacact |
| --- | --- | --- |
| KLK3 | F:gtgcttgtggcctctcgt | R:agcaagatcacgcttttgttc |
| TMPRSS2 | F: cgctggcctactctggaa | R: ctgaggagtcgcactctatcc |
| LEF1 | F: cagtcgacacttccatgtcc | R:gagggatgccagttgtgtg |

Supplementary figure 1


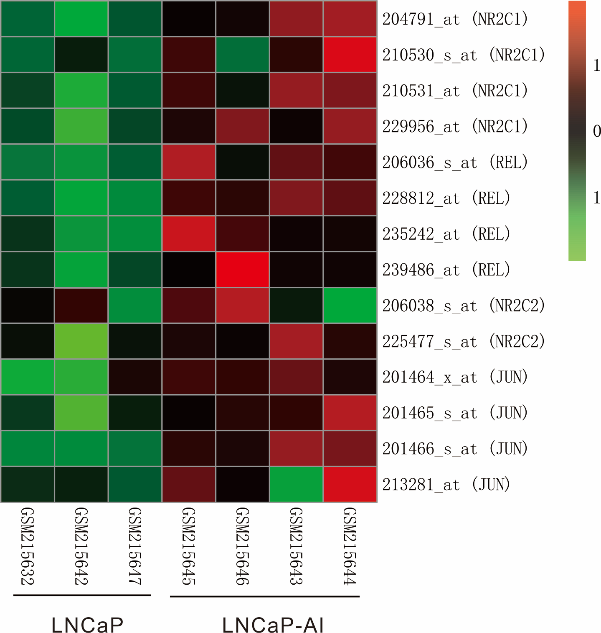


Figure legend：Hierarchical clustering of the expression pattern of AR co-repressors, *NR2C1*, *REL*, *NR2C2*, *JUN* in the LNCaP and LNCaP-AI cells differentially expressed genes from GSE8702. Red color represents the up-regulated genes, and green color represents the down-regulated genes.
